1 **Seroprevalence of viral and vector-borne bacterial pathogens in domestic dogs (*Canis***  
2 ***familiaris*) in northern Botswana**

3

4 **Short title: Infectious disease prevalence in dogs in Botswana**

5

6 Riley E. Thompson<sup>1</sup>, Hayley Adams<sup>2</sup>, Agricola Odoi<sup>3</sup>, Melissa A. Kennedy<sup>3</sup>

7

8 <sup>1</sup>Department of Large Animal Clinical Sciences, College of Veterinary Medicine, University of  
9 Tennessee, Knoxville, TN, USA, <sup>2</sup>Silent Heroes Foundation, USA, <sup>3</sup>Department of Biomedical  
10 and Diagnostic Sciences, College of Veterinary Medicine, University of Tennessee, Knoxville,  
11 TN, USA

12

13 **Correspondence to:**

14 Melissa Kennedy

15 **Email:**

16 mkenned2@utk.edu

17

18 **Author contributions**

19 R.E.T. (University of Tennessee) collected samples, performed ELISA testing, and was involved  
20 in manuscript writing and edits, H.A. (Silent Heroes Foundation) designed experiments and  
21 arranged local logistics, A.O. (University of Tennessee) performed statistical analysis and was  
22 involved in manuscript writing and edits, and M.A.K. (University of Tennessee) was the project  
23 leader and was responsible for experimental design and data analysis.

24

25 **Abstract**

26 **Background:** Domestic dogs (*Canis familiaris*) have the potential to act as disease reservoirs for  
27 wildlife and are important sentinels for common circulating pathogens. Therefore, the infectious  
28 disease seroprevalence among domestic dogs in northern Botswana may be indicative of  
29 pathogen exposure of various wildlife species. The objective of this study was to assess the  
30 seroprevalence of *Ehrlichia spp.*, *Borrelia burgdorferi*, *Anaplasma spp.*, *Dirofilaria immitis*,  
31 canine adenovirus, canine parvovirus, and canine distemper virus in domestic dogs as proxies of  
32 disease prevalence in the local wildlife in the Okavango Delta region of Botswana. Statistical  
33 analysis assessed crude and factor-specific seroprevalence proportions and assessed the factors  
34 age, sex, and geographical location as predictors of seropositivity. Logistic regression was used  
35 to identify adjusted predictors of seropositivity for each of the pathogens of interest.

36 **Results:** Samples from 233 dogs in a total of 7 locations in Maun, Botswana, and surrounding  
37 villages were collected and serologically analyzed. No dogs were seropositive for *B.*  
38 *burgdorferi*, while low seroprevalence proportions were observed for *Anaplasma spp.* (2.2%)  
39 and *D. immitis* (0.9%). Higher seroprevalence proportions were observed for the tick-borne  
40 pathogen, *Ehrlichia spp.* (21.0%), and 19.7% were seropositive for canine adenovirus (hepatitis).  
41 The highest seroprevalence proportions were for canine parvovirus (70.0%) and canine  
42 distemper virus (44.8%). The predictors of seropositivity revealed that adults were more likely  
43 to be seropositive for canine adenovirus, canine distemper virus, and canine parvovirus than  
44 juveniles, and location was a risk factor for canine adenovirus, canine distemper virus, canine  
45 parvovirus, and *Ehrlichia spp.*

46 **Conclusions:** Results indicate that increasing tick control and vaccination campaigns for  
47 domestic dogs may improve the health of domestic animals, and potentially wildlife and humans  
48 in the Okavango Delta since viral and vector-borne bacterial pathogens can be transmitted  
49 between them.

50

## 51 **Introduction**

52 Vaccination of domestic dogs has been reported as a method of wildlife conservation [1] with the  
53 implication that prevalence of transmissible diseases in the domestic canine population has the  
54 potential to affect disease burden in wildlife, including both wild felids and wild canids. African  
55 wild dogs (*Lycaon pictus*), a wild canid species in sub-Saharan Africa, are endangered according  
56 to the International Union for the Conservation of Nature Redlist [2], and the black-footed cat  
57 (*Felis nigripes*), cheetah (*Acinonyx jubatus*), and lion (*Panthera leo*) are all vulnerable species in  
58 Botswana [2] that can be negatively impacted by domestic dog viral and vector-borne bacterial  
59 pathogens [3, 4, 5]. Capturing a sufficient number of African wild dogs, black-footed cats,  
60 cheetah, or lion to perform seroprevalence surveys is not always feasible due to the risk  
61 associated with anesthesia necessary to collect blood samples from these animals. This is  
62 particularly concerning due to the low numbers of individuals as indicated by their conservation  
63 status. McRee, et al. [6] performed a prevalence evaluation of viral pathogens in domestic dogs  
64 in northwest Zimbabwe as a representation of wildlife viral disease prevalence in the region,  
65 particularly African wild dogs.

66 *Ehrlichia spp.*, *Anaplasma spp.*, and *Borrelia burgdorferi* (Lyme disease) are bacterial  
67 pathogens that are transmitted by tick bites [7, 8, 9]. *Dirofilaria immitis*, or heartworm disease, is  
68 a blood-borne parasite transmitted by mosquito bites [10], and canine distemper (CDV),

69 parvovirus (CPV), and adenovirus (CAV) are viral diseases transmitted between individuals [11,  
70 12, 13]. All of these common pathogens in dogs can cause serious illness and/or death. While  
71 the viral diseases, Lyme disease, and heartworm disease can be prevented either by vaccination  
72 or monthly heartworm preventative medication, many communities in southern Africa do not  
73 have the resources to pay for these medications for their animals. Thus, these preventable  
74 diseases may be widespread.

75 Botswana is a land-locked country in southern Africa and is home to the Okavango Delta,  
76 a diverse wetland habitat. Not only is the Okavango Delta home to countless species, it is the  
77 center for tourism in the country, which has become the second most important industry in  
78 Botswana after diamond mining [14]. The Okavango Delta of Botswana is rich with wildlife  
79 which have the chance to interact with domestic animal populations. This potentially results in  
80 cross-transmission of infections between domestic and wild animals implying that infectious  
81 disease exposure in domestic animals might mirror those of wildlife. As disease prevalence of  
82 common infectious diseases in wild carnivores is unknown in the Okavango Delta, this presents  
83 the opportunity to use domestic dogs as sentinels for infectious disease exposure in wildlife.  
84 Therefore, the objective of this study was to assess the seroprevalence of common infectious  
85 diseases (*Ehrlichia spp.*, *Borrelia burgdorferi*, *Anaplasma spp.*, *Dirofilaria immitis*, CDV, CAV,  
86 and CPV) in domestic dogs in Maun, Botswana, an area adjacent to the Okavango Delta, as a  
87 proxy for seroprevalence that would be expected in the wild canid and felid populations.

88

## 89 **Materials and Methods**

### 90 **Animals**

91 All blood collections were done under the direct supervision of the veterinary members of the  
92 Maun Animal Welfare Society (MAWS). The majority (n=128/233) of blood samples from  
93 domestic dogs were collected using a convenience sampling strategy at the MAWS in Maun,  
94 Botswana, from dogs who were presented for castration and vaccination. The remaining blood  
95 samples (n=105/233) were collected in surrounding villages. The uncastrated domestic dogs in  
96 this area were highly unlikely to have been vaccinated and be seropositive to the viral diseases  
97 due to vaccination cross-reaction because MAWS is the main veterinary clinic in the area for the  
98 low income population, and they will not vaccinate animals unless they are also castrated at the  
99 time of vaccination. Therefore, animals that were reproductively intact are likely to be  
100 unvaccinated. Blood samples were collected from a peripheral vein, transported on ice, and  
101 stored at -20°C until testing.

102

### 103 **Sample Analyses**

104 Seroprevalence for CAV, CPV, and CDV were assessed using Biogal Titer Check (Biogal Galed  
105 Laboratories, Kibbutz Galed, Israel) per manufacturer instructions. The Biogal Titer Check  
106 results were reported with a change of color and ‘negative’, ‘positive’, ‘highly positive’, or  
107 ‘inconclusive’ as the range of possible results. The vector-borne diseases, *Ehrlichia spp.*,  
108 *Borrelia burgdorferi*, *Anaplasma spp.*, and *Dirofilaria immitis*, were assessed with IDEXX 4DX  
109 SNAP ELISA (IDEXX, Westbrook, Maine, USA) per manufacturer instructions. The IDEXX  
110 SNAP ELISA results were reported as either ‘positive’ or ‘negative’ by a color change.

111

### 112 **Statistical Analysis**

113 Crude and factor-specific seroprevalence proportions of *Ehrlichia spp.*, *Borrelia burgdorferi*,  
114 *Anaplasma spp.*, *Dirofilaria immitis*, CDV, CAV and CPV as well as their 95% exact confidence  
115 intervals were computed. The factors considered were age, sex, and location. Associations  
116 between seroprevalence and each of the above factors were assessed using the Chi-square or  
117 Fishers Exact tests as appropriate. Significance was set at  $\alpha = 0.05$  for all statistical tests.  
118 Logistic regression was used to identify adjusted predictors of seropositivity for each of the  
119 pathogens of interest.

120

## 121 **Results**

### 122 **Animal demographics**

123 A total of 233 dogs were tested (Table 1). Females dogs made up the majority (54.5%) of the  
124 sampled dogs. Dogs were sampled during the months of June and July 2015 with the majority  
125 (55.4%) of the dogs being sampled in July. The age group distribution was 69.7% adults and  
126 30.0% juveniles. Samples were collected at seven locations in Maun, Botswana, and  
127 surrounding villages: MAWS (n=128), Khumaga (n=13), Boro (n=18), Mathapane (n=16),  
128 Shorobe (n=18), Sexaxa (n=8), and Etsha (n=32).

129

130 **Table 1: Characteristics of dogs included in a seroprevalence assessment of prior exposure**  
131 **to common pathogens in Botswana, 2015**

| Variable     | Number | Percent | 95% Exact Binomial Confidence Interval |
|--------------|--------|---------|----------------------------------------|
| Sex          |        |         |                                        |
| Female       | 127    | 54.5    | 47.9, 61.0                             |
| Male         | 106    | 45.5    | 3.90, 52.1                             |
| Age Category |        |         |                                        |
| Adult        | 163    | 69.7    | 63.6, 75.8                             |
| Juvenile     | 70     | 30.0    | 24.2, 36.3                             |

| Location  |     |      |            |
|-----------|-----|------|------------|
| Boro      | 18  | 7.7  | 4.6, 11.9  |
| Etsha     | 32  | 13.7 | 9.6, 18.8  |
| Khumaga   | 13  | 5.6  | 3.0, 9.4   |
| MAWS      | 128 | 54.9 | 48.3, 61.4 |
| Mathapane | 16  | 6.9  | 4.0, 10.9  |
| Sexaxa    | 8   | 3.4  | 1.5, 6.7   |
| Shorobe   | 18  | 7.7  | 4.6, 11.9  |
| Month     |     |      |            |
| June 2015 | 104 | 44.6 | 38.1, 51.0 |
| July 2015 | 129 | 55.4 | 48.7, 61.8 |

132

### 133 Crude seroprevalence

134 Of 232 individuals, 0% were seropositive for *Borrelia burgdorferi*, 2.2% were seropositive for  
 135 *Anaplasma spp.*, and 0.9% were seropositive for *Dirofilaria immitis* (Table 2). Out of the 233  
 136 animals, 21.0% were seropositive for *Ehrlichia spp.*, 19.7% were seropositive for CAV, 70%  
 137 were seropositive for CPV, and 46.8% were seropositive for CDV.

138

### 139 Table 2: Crude seroprevalence of selected pathogens among domestic dogs in Botswana,

140 2015

| Pathogen              | n   | Number of seropositive samples | Percentage of seropositive samples | 95% Confidence Interval |
|-----------------------|-----|--------------------------------|------------------------------------|-------------------------|
| <i>Anaplasma spp.</i> | 232 | 5                              | 2.2                                | 0.7, 5.0                |
| <i>B.burgdorferi</i>  | 232 | 0                              | 0                                  | 0, 1.6                  |
| <i>D.immitis</i>      | 232 | 2                              | 0.9                                | 0.1, 3.1                |
| CDV                   | 233 | 109                            | 46.8                               | 40.2, 53.4              |
| <i>Ehrlichia spp.</i> | 233 | 49                             | 21.0                               | 16.0, 26.8              |
| CAV                   | 233 | 46                             | 19.7                               | 14.8, 24.4              |
| CPV                   | 233 | 163                            | 70.0                               | 63.6, 75.8              |

141

### 142 Predictors of seropositivity

143 Based on the results of the logistic model, there were no statistically significant predictors (sex,  
144 age, month, or location) ( $P>0.05$ ) for seropositivity of either *Anaplasma spp.* or *D. immitus*  
145 (Table 3).

146 Although age of the dog and location had significant unadjusted associations with the  
147 odds of CAV seropositivity, only age (OR=4.4;  $p<0.0003$ ) was significant in the final; implying  
148 that the odds of CAV seropositivity was 4.4 times higher in adults dogs than in juveniles (Table  
149 4). Similarly, only age had a significant association in the final model for CPV with adults  
150 having 4.4 times higher odds of CPV seropositivity (OR 4.4;  $p<0.0001$ ) than juveniles (Table 4).

151 Based on the results of the logistic model, CDV seropositivity was significantly  
152 associated with age ( $p<0.0001$ ), month ( $p=0.0002$ ), and geographical location of sampling  
153 ( $p=0.0437$ ) (Table 5). Although both age of the dog and geographical location had significant  
154 unadjusted association with the odds of *Ehrlichia spp.* seropositivity (Table 5) when both were  
155 offered to the model in a multivariable analysis, neither was significant. Therefore, there was no  
156 final multivariable model for *Ehrlichia spp.*

157 Controlling for the other two factors in the model, the odds of CDV seropositivity is 12  
158 times higher among adult dogs than the juveniles (Table 6). Similarly, the odds of the dogs  
159 having seropositive results for CDV were 7.8 times higher in June than in July (Table 6). With  
160 respect to geographical location, only Khumaga ( $p=0.0014$ ) and Shorobe ( $p=0.0481$ ) had  
161 significantly different odds of canine seropositivity from MAWS with the odds of the dogs in  
162 Shorobe being 5.8 times higher than those of the reference group (MAWS) (Table 6). By  
163 contrast, the dogs in Khumaga had significantly lower odds (OR=0.072) of testing seropositive  
164 to CDV than dogs in MAWS. The odds of being seropositive for CDV among dogs from the  
165 other locations were not significantly different from that of MAWS. Based on the Hosmer-



166 Lemeshow Goodness-of-fit test, there is no evidence that the canine distemper model did not fit  
 167 the data well (p=0.4813).

168

169 **Table 3: Factor-specific seroprevalence of *Anaplasma spp.* and *D.immitis* among dogs in**

170 **Botswana, 2015**

| <b>Pathogen</b>              | <b>n</b>   | <b>Number of seropositive samples</b> | <b>Percentage of seropositive samples</b> | <b>P-value</b> |
|------------------------------|------------|---------------------------------------|-------------------------------------------|----------------|
| <b><i>Anaplasma spp.</i></b> | <b>232</b> | <b>5</b>                              | <b>2.2</b>                                |                |
| <i>Sex</i>                   |            |                                       |                                           |                |
| <i>Female</i>                | 126        | 4                                     | 3.2                                       | 0.379          |
| <i>Male</i>                  | 106        | 1                                     | 0.9                                       |                |
| <i>Age Category</i>          |            |                                       |                                           |                |
| <i>Adult</i>                 | 162        | 5                                     | 3.1                                       | 0.326          |
| <i>Juvenile</i>              | 70         | 0                                     | 0                                         |                |
| <i>Month</i>                 |            |                                       |                                           |                |
| <i>June</i>                  | 104        | 1                                     | 1.0                                       | 0.383          |
| <i>July</i>                  | 128        | 4                                     | 3.1                                       |                |
| <i>Location</i>              |            |                                       |                                           |                |
| <i>Boro</i>                  | 18         | 0                                     | 0                                         | 0.938          |
| <i>Etsha</i>                 | 32         | 0                                     | 0                                         |                |
| <i>Khumaga</i>               | 13         | 0                                     | 0                                         |                |
| <i>MAWS</i>                  | 127        | 5                                     | 3.9                                       |                |
| <i>Mathapane</i>             | 16         | 0                                     | 0                                         |                |
| <i>Sexaxa</i>                | 8          | 0                                     | 0                                         |                |
| <i>Shorobe</i>               | 18         | 0                                     | 0                                         |                |
| <b><i>D.immitis</i></b>      | <b>232</b> | <b>2</b>                              | <b>0.9</b>                                |                |
| <i>Sex</i>                   |            |                                       |                                           |                |
| <i>Female</i>                | 126        | 2                                     | 1.6                                       | 0.502          |
| <i>Male</i>                  | 106        | 0                                     | 0                                         |                |
| <i>Age Category</i>          |            |                                       |                                           |                |
| <i>Adult</i>                 | 162        | 2                                     | 1.2                                       | 1.000          |
| <i>Juvenile</i>              | 70         | 0                                     | 0                                         |                |
| <i>Month</i>                 |            |                                       |                                           |                |
| <i>June</i>                  | 104        | 1                                     | 1.0                                       | 1.000          |
| <i>July</i>                  | 128        | 1                                     | 0.8                                       |                |
| <i>Location</i>              |            |                                       |                                           |                |
| <i>Boro</i>                  | 18         | 0                                     | 0                                         | 0.242          |
| <i>Etsha</i>                 | 32         | 0                                     | 0                                         |                |
| <i>Khumaga</i>               | 13         | 0                                     | 0                                         |                |
| <i>MAWS</i>                  | 127        | 1                                     | 0.8                                       |                |

|           |    |   |      |
|-----------|----|---|------|
| Mathapane | 16 | 0 | 0    |
| Sexaxa    | 8  | 1 | 12.5 |
| Shorobe   | 18 | 0 | 0    |

171

172 **Table 4: Factor-specific seroprevalence of CAV and CPV among dogs in Botswana, 2015**

| <b>Pathogen</b>     | <b>n</b>   | <b>Number of seropositive samples</b> | <b>Percentage of seropositive samples</b> | <b>P-value</b> |
|---------------------|------------|---------------------------------------|-------------------------------------------|----------------|
| <b>CAV</b>          | <b>233</b> | <b>46</b>                             | <b>19.7</b>                               |                |
| <i>Sex</i>          |            |                                       |                                           |                |
| <i>Female</i>       | 127        | 20                                    | 15.6                                      | 0.101          |
| <i>Male</i>         | 106        | 26                                    | 24.5                                      |                |
| <i>Age Category</i> |            |                                       |                                           |                |
| <i>Adult</i>        | 163        | 41                                    | 25.2                                      | 0.001          |
| <i>Juvenile</i>     | 70         | 5                                     | 7.1                                       |                |
| <i>Month</i>        |            |                                       |                                           |                |
| <i>June</i>         | 104        | 26                                    | 25.0                                      | 0.097          |
| <i>July</i>         | 129        | 20                                    | 15.5                                      |                |
| <i>Location</i>     |            |                                       |                                           |                |
| <i>Boro</i>         | 18         | 6                                     | 33.3                                      | 0.043          |
| <i>Etsha</i>        | 32         | 5                                     | 15.6                                      |                |
| <i>Khumaga</i>      | 13         | 2                                     | 15.4                                      |                |
| <i>MAWS</i>         | 128        | 22                                    | 17.2                                      |                |
| <i>Mathapane</i>    | 16         | 8                                     | 50                                        |                |
| <i>Sexaxa</i>       | 8          | 0                                     | 0                                         |                |
| <i>Shorobe</i>      | 18         | 3                                     | 16.7                                      |                |
| <b>CPV</b>          | <b>233</b> | <b>163</b>                            | <b>70.0</b>                               |                |
| <i>Sex</i>          |            |                                       |                                           |                |
| <i>Female</i>       | 127        | 92                                    | 72.4                                      | 0.392          |
| <i>Male</i>         | 106        | 71                                    | 67.0                                      |                |
| <i>Age Category</i> |            |                                       |                                           |                |
| <i>Adult</i>        | 163        | 130                                   | 79.8                                      | <0.001         |
| <i>Juvenile</i>     | 70         | 33                                    | 47.1                                      |                |
| <i>Month</i>        |            |                                       |                                           |                |
| <i>June</i>         | 104        | 78                                    | 75.0                                      | 0.152          |
| <i>July</i>         | 129        | 85                                    | 65.9                                      |                |
| <i>Location</i>     |            |                                       |                                           |                |
| <i>Boro</i>         | 18         | 15                                    | 83.3                                      | 0.025          |
| <i>Etsha</i>        | 32         | 16                                    | 50                                        |                |
| <i>Khumaga</i>      | 13         | 6                                     | 46.2                                      |                |
| <i>MAWS</i>         | 128        | 92                                    | 71.9                                      |                |
| <i>Mathapane</i>    | 16         | 12                                    | 75                                        |                |
| <i>Sexaxa</i>       | 8          | 6                                     | 75                                        |                |
| <i>Shorobe</i>      | 18         | 16                                    | 88.9                                      |                |

173

174 **Table 5: Factor-specific seroprevalence of CDV and *Ehrlichia* spp. among dogs in**

175 **Botswana, 2015**

| <b>Pathogen</b>              | <b>n</b>   | <b>Number of seropositive samples</b> | <b>Percentage of seropositive samples</b> | <b>P-value</b> |
|------------------------------|------------|---------------------------------------|-------------------------------------------|----------------|
| <b>CDV</b>                   | <b>233</b> | <b>109</b>                            | <b>46.8</b>                               |                |
| <i>Sex</i>                   |            |                                       |                                           |                |
| <i>Female</i>                | 127        | 62                                    | 48.8                                      | 0.512          |
| <i>Male</i>                  | 106        | 47                                    | 44.3                                      |                |
| <i>Age Category</i>          |            |                                       |                                           |                |
| <i>Adult</i>                 | 163        | 99                                    | 60.7                                      | <0.001         |
| <i>Juvenile</i>              | 70         | 10                                    | 14.3                                      |                |
| <i>Month</i>                 |            |                                       |                                           |                |
| <i>June</i>                  | 104        | 71                                    | 68.3                                      | <0.001         |
| <i>July</i>                  | 129        | 38                                    | 29.5                                      |                |
| <i>Location</i>              |            |                                       |                                           |                |
| <i>Boro</i>                  | 18         | 14                                    | 77.8                                      | <0.001         |
| <i>Etsha</i>                 | 32         | 6                                     | 18.8                                      |                |
| <i>Khumaga</i>               | 13         | 2                                     | 15.4                                      |                |
| <i>MAWS</i>                  | 128        | 51                                    | 39.8                                      |                |
| <i>Mathapane</i>             | 16         | 13                                    | 81.3                                      |                |
| <i>Sexaxa</i>                | 8          | 6                                     | 75.0                                      |                |
| <i>Shorobe</i>               | 18         | 17                                    | 94.4                                      |                |
| <b><i>Ehrlichia</i> spp.</b> | <b>233</b> | <b>49</b>                             | <b>21.0</b>                               |                |
| <i>Sex</i>                   |            |                                       |                                           |                |
| <i>Female</i>                | 126        | 28                                    | 22.1                                      | 0.748          |
| <i>Male</i>                  | 106        | 21                                    | 19.8                                      |                |
| <i>Age Category</i>          |            |                                       |                                           |                |
| <i>Adult</i>                 | 163        | 40                                    | 24.5                                      | 0.054          |
| <i>Juvenile</i>              | 70         | 9                                     | 12.9                                      |                |
| <i>Month</i>                 |            |                                       |                                           |                |
| <i>June</i>                  | 104        | 22                                    | 21.2                                      | 1.000          |
| <i>July</i>                  | 129        | 27                                    | 20.9                                      |                |
| <i>Location</i>              |            |                                       |                                           |                |
| <i>Boro</i>                  | 18         | 3                                     | 16.7                                      | <0.001         |
| <i>Etsha</i>                 | 32         | 0                                     | 0                                         |                |
| <i>Khumaga</i>               | 13         | 0                                     | 0                                         |                |
| <i>MAWS</i>                  | 128        | 40                                    | 31.3                                      |                |
| <i>Mathapane</i>             | 16         | 3                                     | 18.8                                      |                |
| <i>Sexaxa</i>                | 8          | 2                                     | 25                                        |                |
| <i>Shorobe</i>               | 18         | 1                                     | 7.6                                       |                |

176

177 **Table 6: Results of multivariable logistic regression showing predictors of CDV sero-**  
 178 **positivity among domestic dogs in Botswana, 2019**

179

| Predictor       | Odds Ratio | 95% Confidence Interval | P-value |
|-----------------|------------|-------------------------|---------|
| <b>Age</b>      |            |                         |         |
| Adult           | 12.4       | 4.8, 32.1               | <0.0001 |
| Juvenile        | Referent   | Referent                |         |
| <b>Month</b>    |            |                         |         |
| June            | 7.8        | 2.6, 23.1               | 0.0002  |
| July            | Referent   | Referent                |         |
| <b>Location</b> |            |                         |         |
| Boro            | 0.7        | 0.2, 3.3                | 0.8022  |
| Etsha           | 0.7        | 0.2, 1.9                | 0.7233  |
| Khumaga         | 0.07       | 0.01, 0.5               | 0.0014  |
| Mathapane       | 1.2        | 0.2, 6.5                | 0.5889  |
| Sexaxa          | 1.2        | 0.2, 9.6                | 0.6601  |
| Shorobe         | 5.8        | 0.6, 57.8               | 0.0481  |
| MAWS            | Referent   | Referent                |         |

180

181 **Discussion**

182 Domestic animals can serve as disease reservoirs for wildlife. Wild animal populations,  
 183 including various canid and felid species, have the potential to be infected by CDV, CPV, CAV,  
 184 *D. immitis*, *B. burgdorferi*, *Ehrlichia spp.* and *Anaplasma spp.*, which are pathogens carried by  
 185 the domestic animal population. Free-ranging cheetah (*Acinonyx jubatus*) in Namibia have been  
 186 reported to have antibodies to CPV (though this test cross-reacts with feline panleukopenia virus)  
 187 and CDV [15]. A captive breeding group of African wild dogs in Tanzania showed 94%  
 188 mortality after infection with CDV [16], and another group of African wild dogs in Kenya had  
 189 higher disease-related mortality rates from 21% to 50% and CDV antibodies rose from 1-4% to  
 190 76% over a three-year period [3]. In Chobe National Park, Botswana, in 1996, a pack of twelve  
 191 African wild dogs was reduced to two animals following an outbreak of CDV [17]. While the  
 192 prevalence in the current study was low (0.9%), *D. immitis* can infect wildlife, with reports of *D.*

193 *immitis* in a captive lion in Spain [18] and a captive black-footed cat in Florida [19]. Butler, et  
194 al. [20] indicated that domestic dogs in northwest Zimbabwe are a source of disease transmission  
195 for leopards (*Panthera pardus*), lions, and spotted hyenas (*Crocuta crocuta*), as these predator  
196 species feed on domestic dogs as prey. A survey of domestic dogs and African Wild dogs in  
197 Kenya from 2001 to 2009 showed 16% of African wild dogs and 48% of domestic dogs had been  
198 exposed to CDV, 25% of African wild dogs and 64% of domestic dogs had been exposed to  
199 CPV, and 80% of African wild dogs and 86% of domestic dogs had been exposed to *E. canis*  
200 [21]. Similar to the Kenya evaluation, the results of the present study revealed 46.8% CDV  
201 seropositivity and 70.0% CPV seropositivity in domestic dogs. However, we found lower  
202 seropositivity rates for *Ehrlichia spp.* (21.0%) compared to the Kenya study.

203         When comparing regional infectious disease prevalence differences, similar  
204 seroprevalence for viral diseases in domestic dogs was determined in Botswana as was reported  
205 in a similar study performed in Zimbabwe in 2012 [6]. A study of domestic dogs in northwest  
206 Zimbabwe reported that 34% had antibodies to CDV, 84% had antibodies to CPV, and 13% had  
207 antibodies for CAV [6]. These results are similar to those of the present study of 46.8% for  
208 CDV, 70.0% for CPV, and 19.7% for CAV. Another seroprevalence study evaluating domestic  
209 dogs in northeast Namibia in 1993 and 1994 found similar exposure to CDV (44.3%), but lower  
210 prevalence of CPV (47.1%) and higher prevalence of CAV (64.3%) [22]. Both Zimbabwe and  
211 Namibia border Botswana on its eastern and western edges, respectively. Viral diseases spread  
212 from animal to animal so localized differences in exposure are expected, but vectored pathogens  
213 depend on prevalence of the pathogen, prevalence of the vector, and on contact between the  
214 vector and the susceptible animal host. Williams, et al. [23] assessed prevalence of several  
215 hemoparasites, including *Ehrlichia spp.*, in domestic dogs, lions, spotted hyena, and African wild

216 dogs in 2009 to 2011 in Zambia, another country in southern Africa that borders Botswana, and  
217 samples were evaluated by polymerase chain reaction which only reveals active infections rather  
218 than current and past exposure. No carnivores had positive results for *E. canis* or *E. ewingii*  
219 [23], which does not rule out presence of ehrlichia in the study area.

220 As ticks are the vectors for *B. burgdorferi*, *Ehrlichia spp.* and *Anaplasma spp.*, tick  
221 prevalence is a crucial factor in the spread of these pathogens. While no recent studies have  
222 reported tick prevalence in northern Botswana, Eygelaar, *et al.* [24] reported that African buffalo  
223 (*Syncerus caffer*) in the Okavango Delta had lower prevalence of tick-borne diseases than  
224 African buffalo in Chobe National Park, a region in northeast Botswana that is closer to the study  
225 region assessed by McRee, *et al.* [6]. Perhaps the same cause is responsible for the reduced tick-  
226 vectored diseases in African buffalo and domestic dogs in the Okavango Delta compared to  
227 northwest Zimbabwe. Eygelaar, *et al.* [24] hypothesized that veterinary fences in the Okavango  
228 Delta prevented direct contact between the African buffalo and cattle, which were not present in  
229 Chobe National Park. Perhaps these same fences reduce tick spread from wildlife to domestic  
230 dogs and vice versa, which limits the spread of the vector-borne diseases in the Okavango Delta  
231 which were not present in northwest Zimbabwe. More research must be performed to determine  
232 if the differences in *Ehrlichia spp.* seroprevalence is due to a reduction in total tick numbers or  
233 another cause, such as physical barriers. The high viral disease seroprevalence, similar to those  
234 in northwest Zimbabwe, is likely due to lack of vaccination. While strong efforts are being  
235 actively put forth by local not-for-profit organizations, the number of unvaccinated dogs remains  
236 much greater than the number of vaccinated dogs.

237 Factor-specific seroprevalence indicated significant associations between seropositivity  
238 to these common canine infectious diseases and age, month, and location. Adults are more likely

239 to be seropositive for CAV, CDV, and CPV, which is likely due to having more time to be  
240 exposed to the viruses than juveniles. There was a significant association between seropositivity  
241 for CDV and month with June having higher risk than July. Lastly, geographical location is a  
242 risk factor for CAV, CDV, and CPV because viral pathogens are transmitted either by direct  
243 contact or contact with bodily fluids. Therefore, geographical locations with high rates of these  
244 pathogens allow easy transmission to naïve individuals. Location was also a risk factor for *E.*  
245 *canis* perhaps because of tick concentrations in certain locations or due to an increase in the  
246 pathogen in the dogs of certain locations that perpetuates the elevated infection rate (ticks can  
247 spread the pathogen transstadially, but not transovarially [7]).

248 While the viral pathogens evaluated in this study cannot infect humans, some of the  
249 vectored pathogens can affect humans. In addition to affecting domestic and wild animal  
250 populations, *E. canis* and *E. ewingii* have been reported in humans [25, 26]. *B. burgdorferi*, the  
251 causative organism for Lyme disease and *A. phagocytophilum* [27, 28] are also zoonotic. The  
252 ‘One Health’ paradigm, a collaborative approach to animal, human, and environmental health  
253 that recognizes their interconnectivity, is particularly important, since reducing disease risk in  
254 domestic animals will reduce disease risk in wildlife and human populations. By increasing  
255 vaccination and reducing tick burden in domestic dogs, human health and environmental health,  
256 in the case of wildlife, are improved [29, 30].

257 One of the limitations of this study was that serology detects exposure to the pathogen,  
258 but it does not determine the rate of active infections. Thus, sero-prevalence indicates that  
259 pathogen exposure has occurred, but current risk of infection is unknown. This aspect is  
260 important for human and wildlife health because new infections may increase disease burden in  
261 these populations.

262 Information regarding disease prevalence is necessary to determine domestic animal,  
263 wildlife, and human disease risk. This study reveals the need for local tick surveys to determine  
264 the cause of tick-borne pathogen prevalence differences between Botswana and surrounding  
265 countries. In conclusion, further disease testing and vaccination of both domestic dogs and  
266 wildlife would benefit domestic animals, wildlife, and humans in the Okavango Delta region of  
267 Botswana.

268

### 269 **Acknowledgements**

270 We would like to thank all of the staff at the Maun Animal Welfare Society, including Tana,  
271 Justine, KC, and Nation. We would also like to thank Hansje de Waard, Deirdre Halloran, and  
272 Anna Hewitt for generous assistance in sample collection.

273

### 274 **References**

- 275 1. Cleaveland S, Kaare M, Knobel D, Laurenson MK. Canine vaccination—providing  
276 broader benefits for disease control. *Vet microbiol.* 2006 Oct 5;117(1):43-50.
- 277 2. International Union for Conservation of Nature. The IUCN Red List of Threatened  
278 Species; 2019 [cited 2019 May 13]. Database [Internet]. Available from:  
279 <http://www.iucnredlist.org/>
- 280 3. Alexander KA, Appel MJ. African wild dogs (*Lycaon pictus*) endangered by a canine  
281 distemper epizootic among domestic dogs near the Masai Mara National Reserve, Kenya.  
282 *J Wildl Dis.* 1994 Oct;30(4):481-485.



- 283 4. Roelke-Parker ME, Munson L, Packer C, Kock R, Cleaveland S, Carpenter M, et al. A  
284 canine distemper virus epidemic in Serengeti lions (*Panthera leo*). *Nature*. 1996  
285 Feb;379(6564):441.
- 286 5. Steinel A, Parrish CR, Bloom ME, Truyen U. Parvovirus infections in wild carnivores. *J*  
287 *Wildl Dis*. 2001 Jul;37(3):594-607.
- 288 6. McRee A, Wilkes RP, Dawson J, Parry R, Foggin C, Adams H, Kennedy MA.  
289 Serological detection of infection with canine distemper virus, canine parvovirus and  
290 canine adenovirus in communal dogs from Zimbabwe. *J S Afr Vet Assoc*. 2014  
291 Jan;85(1):01-2.
- 292 7. Groves MG, Dennis GL, Amyx HL, Huxsoll DL. Transmission of *Ehrlichia canis* to dogs  
293 by ticks (*Rhipicephalus sanguineus*). *Am J Vet Res*. 1975 Jul;36(7):937-940.
- 294 8. Stuen S. *Anaplasma phagocytophilum*-the most widespread tick-borne infection in  
295 animals in Europe. *Vet Res Commun*. 2007 Aug 1;31(1):79-84.
- 296 9. Johnson RC, Schmid GP, Hyde FW, Steigerwalt AG, Brenner DJ. *Borrelia burgdorferi*  
297 sp. nov.: etiologic agent of Lyme disease. *Int J Syst Evol Microbiol*. 1984 Oct  
298 1;34(4):496-497.
- 299 10. GRIEVE RB, LOK JB, GLICKMAN LT. Epidemiology of canine heartworm infection.  
300 *Epidemiol Rev*. 1983 Jan 1;5(1):220-246.
- 301 11. Harder TC, Osterhaus AD. Canine distemper virus—a morbillivirus in search of new  
302 hosts?. *Trends Microbiol*. 1997 Mar 1;5(3):120-124.
- 303 12. Goddard A, Leisewitz AL. Canine parvovirus. *Vet Clin North Am Small Anim Pract*.  
304 2010 Nov 1;40(6):1041-1053.

- 305 13. Decaro N, Martella V, Buonavoglia C. Canine adenoviruses and herpesvirus. Vet Clin  
306 North Am Small Anim Pract. 2008 Jul 1;38(4):799-814.
- 307 14. Mmopelwa G, Blignaut JN. The Okavango Delta. The value of tourism: economic. South  
308 African Journal of Economic and Management Sciences. 2006 Mar 1;9(1):113-127.
- 309 15. Munson L, Marker L, Dubovi E, Spencer JA, Evermann JF, O'Brien SJ. Serosurvey of  
310 viral infections in free-ranging Namibian cheetahs (*Acinonyx jubatus*). J Wildl Dis. 2004  
311 Jan;40(1):23-31.
- 312 16. van de Bildt MW, Kuiken T, Visee AM, Lema S, Fitzjohn TR, Osterhaus AD. Distemper  
313 outbreak and its effect on African wild dog conservation. Emerg Infect Dis. 2002  
314 Feb;8(2):212.
- 315 17. Alexander KA, Kat PW, Munson LA, Kalake A, Appel MJ. Canine distemper-related  
316 mortality among wild dogs (*Lycaon pictus*) in Chobe National Park, Botswana. J Zoo  
317 Wildl Med. 1996 Sep;27(3):426-427
- 318 18. De Ybanez MR, Martínez-Carrasco C, Martínez JJ, Ortiz JM, Attout T, Bain O.  
319 *Dirofilaria immitis* in an African lion (*Panthera leo*). Vet Rec. 2006 Feb 18;158(7):24
- 320 19. Deem SL, Heard DJ, LaRock R. Heartworm (*Dirofilaria immitis*) disease and  
321 glomerulonephritis in a black-footed cat (*Felis nigripes*). J Zoo Wildl Med. 1998 Jun  
322 1;29:199-202.
- 323 20. Butler JR, Du Toit JT, Bingham J. Free-ranging domestic dogs (*Canis familiaris*) as  
324 predators and prey in rural Zimbabwe: threats of competition and disease to large wild  
325 carnivores. Biol Conserv. 2004 Feb 1;115(3):369-378.

- 326 21. Woodroffe R, Prager KC, Munson L, Conrad PA, Dubovi EJ, Mazet JA. Contact with  
327 domestic dogs increases pathogen exposure in endangered African wild dogs (*Lycaon*  
328 *pictus*). PLoS One. 2012 Jan 6;7(1):e30099.
- 329 22. Laurenson K, Van Heerden J, Stander P, Van Vuuren MJ. Seroepidemiological survey of  
330 sympatric domestic and wild dogs (*Lycaon pictus*) in Tsumkwe District, northeastern  
331 Namibia. Onderstepoort J Vet Res. 1997 Dec 1;64:313-316.
- 332 23. Williams BM, Berentsen A, Shock BC, Teixeira M, Dunbar MR, Becker MS, et al.  
333 Prevalence and diversity of Babesia, Hepatozoon, Ehrlichia, and Bartonella in wild and  
334 domestic carnivores from Zambia, Africa. Parasitol Res. 2014 Mar 1;113(3):911-918.
- 335 24. Eygelaar D, Jori F, Mokopasetso M, Sibeko KP, Collins NE, Vorster I, et al. Tick-borne  
336 haemoparasites in African buffalo (*Syncerus caffer*) from two wildlife areas in Northern  
337 Botswana. Parasit Vectors. 2015 Dec;8(1):26.
- 338 25. Conrad ME. Ehrlichia canis: a tick-borne rickettsial-like infection in humans living in the  
339 southeastern United States. Am J Med Sci. 1989 Jan 1;297(1):35-37.
- 340 26. Buller RS, Arens M, Hmiel SP, Paddock CD, Sumner JW, Rikihisa Y, et al. Ehrlichia  
341 ewingii, a newly recognized agent of human ehrlichiosis. N Engl J Med. 1999 Jul  
342 15;341(3):148-155.
- 343 27. Murphree Bacon R, Kugeler KJ, Mead PS. Surveillance for Lyme disease--United States,  
344 1992-2006. 2008.
- 345 28. Dumler JS, Choi KS, Garcia-Garcia JC, Barat NS, Scorpio DG, Garyu JW, et al. Human  
346 granulocytic anaplasmosis and Anaplasma phagocytophilum. Emerg Infect Dis. 2005  
347 Dec;11(12):1828.

- 348 29. Day MJ. One health: the importance of companion animal vector-borne diseases. *Parasit*  
349 *Vectors*. 2011 Dec;4(1):49.
- 350 30. Dantas-Torres F, Chomel BB, Otranto D. Ticks and tick-borne diseases: a One Health  
351 perspective. *Trends Parasitol*. 2012 Oct 1;28(10):437-446.
- 352
